# Supplementary material for: Value of Information Analysis Informing Adoption and Research Decisions in a Portfolio of Health Care Interventions
Source: PubMed Central journal article supplement — MDM Policy Pract. 2016 Jul 7;1(1):2381468316642238. doi: 10.1177/2381468316642238 (PMC6125050; doi:10.1177/2381468316642238), 2016-07-07
Supplement: DS_10.1177_2381468316642238.pdf [file DS_10.1177_2381468316642238.pdf]

## Appendix 1

### Value of information analysis

We started the analysis by estimating the EVPI. For a cost-effectiveness analysis informing a decision on a number of interventions ( $i$ ) with unknown parameters ( $\theta$ ), Monte Carlo simulation takes  $K$  samples from the joint distribution of  $\theta$ , and generates a corresponding set of  $K$  net benefits ( $NB(i, \theta^1), \dots, NB(i, \theta^K)$ ), for each intervention. Averaging these values, the optimal decision with current information is to adopt the intervention with the maximum expected NB,  $\max_i E_{\theta} NB(i, \theta)$ . If we have perfect information on  $\theta$ , the maximized NB becomes  $\max_i NB(i, \theta)$ ; however, because the true value of  $\theta$  is unknown, averaging the maximized values gives the expected maximum NB under perfect information,  $E_{\theta} \max_i NB(i, \theta)$ . The EVPI is the difference between the expected NB of a decision with perfect information and the decision based on current information:

$$EVPI = E_{\theta} \max_i NB(i, \theta) - \max_i E_{\theta} NB(i, \theta) \quad \text{Equation 1}$$

EVPI calculated using Equation 1 is an estimate for an individual patient episode (i.e., per-patient EVPI); however, because decisions are taken at the population level, population VOI measures should be determined, which is the per-patient estimate multiplied by the total number of patients who will benefit from additional information over the expected lifetime of the intervention. Given the acute nature of the interventions, the population VOI measure can be expressed as follows:

$$\text{Population VOI measure} = \text{VOI measure} \cdot \left( \sum_{t=1}^T \frac{I_t}{(1+r)^t} \right) \quad \text{Equation 2}$$

Where  $T$  is the lifetime of the intervention,  $I_t$  is the incidence in each future time period  $t$ , and  $r$  is the annual discount rate which we set at 5%. Time horizons in this study ranged from five to ten years. Sensitivity analyses were performed to test the impact of varying the time horizon and the WTP threshold on VOI estimates.

When the population EVPI appears to be too small compared with the expected research costs, additional research would not be required, and accordingly, the decision would be to adopt or reject the intervention based on the current evidence. On the other hand, when the population EVPI is likely to exceed the costs of additional research, then further research is potentially worthwhile. In this case the EVPPI would be calculated to know the focus and type of the additional research.

For a subset of one or more parameters where  $(\theta_I)$  is the parameters of interest and  $(\theta_C)$  is the complementary set of parameters, the optimal decision would be that with the maximum expected NB after averaging over the distribution of  $\theta_C$ , conditional on  $\theta_I$ ,  $\max_i E_{(\theta_C|\theta_I)} NB(i, \theta_I, \theta_C)$ . Again, because we do not have perfect information on  $\theta_I$  we must take the expectation with respect to  $\theta_I$  which is  $E_{\theta_I} \max_i E_{(\theta_C|\theta_I)} NB(i, \theta_I, \theta_C)$ . The EVPPI is the difference between the expected NB with perfect information and the expected NB with current information:

$$EVPPI_{\theta_I} = E_{\theta_I} \max_i E_{(\theta_C|\theta_I)} NB(i, \theta_I, \theta_C) - \max_i E_{\theta} NB(i, \theta) \quad \text{Equation 3}$$

The Monte Carlo solution to the conditional term in Equation 3 is to run a two-level simulation. The outer-loop samples from  $\theta_I$ , and then the inner loop samples from  $\theta_C$  conditional on the outer sampled value of  $\theta_I$ . Convergence of the EVPPI estimates informed the number of inner and outer simulations. Nevertheless, When the model is linear (e.g., decision tree) with no correlation between input parameters, a one-level simulation approach can be used in which we sample from  $\theta_I$ , but keep the complementary parameters  $\theta_C$  fixed at their prior means:

$$EVPPI_{\theta_I} = E_{\theta_I} \max_i NB(i, \theta_I, E(\theta_C)) - \max_i E_{\theta} NB(i, \theta) \quad \text{Equation 4}$$

The next step was to estimate the EVSI for a future study with a sample size  $n$  that will provide additional information  $D$  for  $\theta_I$ . Assuming that  $\theta_I$  and  $\theta_C$  are a priori independent, the expected optimal NB given  $D$  is found by taking the expectation over the posterior distribution of  $\theta_I$  given  $D$  and the prior distribution of  $\theta_C$ , which is  $\max E_{\theta_C, (\theta_I|D)} NB(i, \theta_I, \theta_C)$ . As  $D$  is unknown, we average over the distribution of  $D$ , which gives  $E_D \max_i E_{\theta_C, (\theta_I|D)} NB(i, \theta_I, \theta_C)$ . The EVSI is the difference between this, and the expected NB with current information:

$$EVSI_n = E_D \max_i E_{\theta_C, \theta_I|D} NB(i, \theta_I, \theta_C) - \max_i E_{\theta} NB(i, \theta) \quad \text{Equation 5}$$

The first term in Equation 5 has a two-level Monte Carlo solution. The inner expectation requires a Bayes update of  $\theta_I$  given data  $D$ , and the averaging of the NB function over this posterior distribution combined with the prior distribution of  $\theta_C$ . This is made assuming that the likelihood for the proposed data  $D$  is conjugate with prior parameter distributions, which means that the parameters for posterior distributions can be estimated using closed forms and to scalar priors with no correlations. The nested simulation can be avoided in linear models with no parameter correlation.

$$EVSI_n = E_D \max_i NB(i, E(\theta_I|D), E(\theta_C)) - \max_i E_{\theta} NB(i, \theta) \quad \text{Equation 6}$$
